# Supplementary material for: NR1H3 Expression is a Prognostic Factor of Overall Survival for Patients with Muscle-Invasive Bladder Cancer
Source: PubMed Central journal article supplement — J Cancer. 2017 Mar 7;8(5):852–60. doi: 10.7150/jca.17845 (PMC5381174; doi:10.7150/jca.17845), 2017-03-07

Supplementary Table 1. Forty-eight nuclear receptor genes in homo sapiens.

| UniGene ID | TCGA gene symbol | Full name                                                                                              |
|------------|------------------|--------------------------------------------------------------------------------------------------------|
| Hs.76704   | AR               | Androgen receptor                                                                                      |
| Hs.208124  | ESR1             | Estrogen receptor $\alpha$                                                                             |
| Hs.660607  | ESR2             | Estrogen receptor $\beta$                                                                              |
| Hs.110849  | ESRRA            | Estrogen-related receptor $\alpha$                                                                     |
| Hs.435845  | ESRRB            | Estrogen-related receptor $\beta$                                                                      |
| Hs.444225  | ESRRG            | Estrogen-related receptor $\gamma$                                                                     |
| Hs.116462  | HNF4A            | Hepatocyte nuclear factor 4 receptor $\alpha$                                                          |
| Hs.241529  | HNF4G            | Hepatocyte nuclear factor 4 receptor $\gamma$                                                          |
| Hs.268490  | NR0B1            | Dosage-sensitive sex reversal-adrenal hypoplasia congenita critical region on the X chromosome, gene 1 |
| Hs.427055  | NR0B2            | Small heterodimeric partner                                                                            |
| Hs.592130  | NR1D1            | Rev-Erb $\alpha$                                                                                       |
| Hs.37288   | NR1D2            | Rev-Erb $\beta$                                                                                        |
| Hs.432976  | NR1H2            | Oxysterol receptor $\beta$                                                                             |
| Hs.438863  | NR1H3            | Oxysterol receptor $\alpha$                                                                            |
| Hs.282735  | NR1H4            | Farnesoid receptor $\alpha$                                                                            |
| Hs.7303    | NR1I2            | Pregnane X receptor                                                                                    |
| Hs.349642  | NR1I3            | Constitutive androstane receptor                                                                       |
| Hs.108301  | NR2C1            | TR2                                                                                                    |
| Hs.555973  | NR2C2            | TR4                                                                                                    |
| Hs.157688  | NR2E1            | Tailless homolog                                                                                       |
| Hs.187354  | NR2E3            | Photoreceptor-specific nuclear receptor                                                                |
| Hs.519445  | NR2F1            | Chicken ovalbumin upstream promoter transcription factor I                                             |
| Hs.347991  | NR2F2            | Chicken ovalbumin upstream promoter transcription factor II                                            |

|           |       |                                                                   |
|-----------|-------|-------------------------------------------------------------------|
| Hs.466148 | NR2F6 | V-erbA related protein                                            |
| Hs.122926 | NR3C1 | Glucocorticoid receptor                                           |
| Hs.163924 | NR3C2 | Mineralocorticoid receptor                                        |
| Hs.524430 | NR4A1 | growth factor-inducible immediate early gene nur/77-like receptor |
| Hs.563344 | NR4A2 | Nur-related protein 1                                             |
| Hs.279522 | NR4A3 | Neuron-derived orphan receptor 1                                  |
| Hs.495108 | NR5A1 | Steroidogenic factor-1/ELP                                        |
| Hs.33446  | NR5A2 | Fetoprotein transcription factor                                  |
| Hs.586460 | NR6A1 | Germ cell nuclear factor 1                                        |
| Hs.32405  | PGR   | Progesterone receptor                                             |
| Hs.103110 | PPARA | Peroxisome proliferator activated receptor $\alpha$               |
| Hs.696032 | PPARD | Peroxisome proliferator activated receptor- $\delta/\beta$        |
| Hs.162646 | PPARG | Peroxisome proliferator activated receptor $\gamma$               |
| Hs.654583 | RARA  | Retinoic acid receptor $\alpha$                                   |
| Hs.654490 | RARB  | Retinoic acid receptor $\beta$                                    |
| Hs.733399 | RARG  | Retinoic acid receptor $\gamma$                                   |
| Hs.560343 | RORA  | RAR-related orphan receptor $\alpha$                              |
| Hs.494178 | RORB  | RAR-related orphan receptor $\beta$                               |
| Hs.256022 | RORC  | RAR-related orphan receptor $\gamma$                              |
| Hs.590886 | RXRA  | Retinoid X receptor $\alpha$                                      |
| Hs.388034 | RXRB  | Retinoid X receptor $\beta$                                       |
| Hs.26550  | RXRG  | Retinoid X receptor $\gamma$                                      |
| Hs.724    | THRA  | Thyroid hormone receptor $\alpha$                                 |
| Hs.187861 | THRB  | Thyroid hormone receptor $\beta$                                  |
| Hs.524368 | VDR   | Vitamin D3 receptor                                               |

---

# Supplementary Figure 1

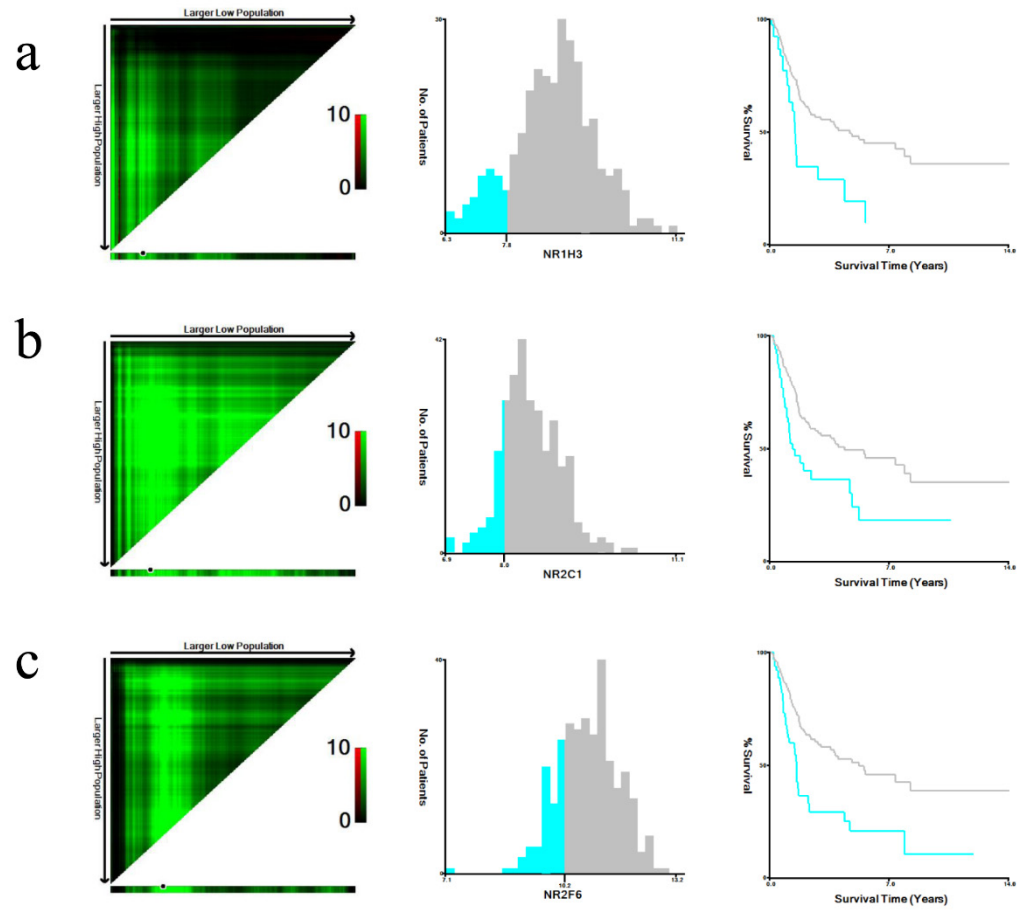

## Supplementary Figure 2

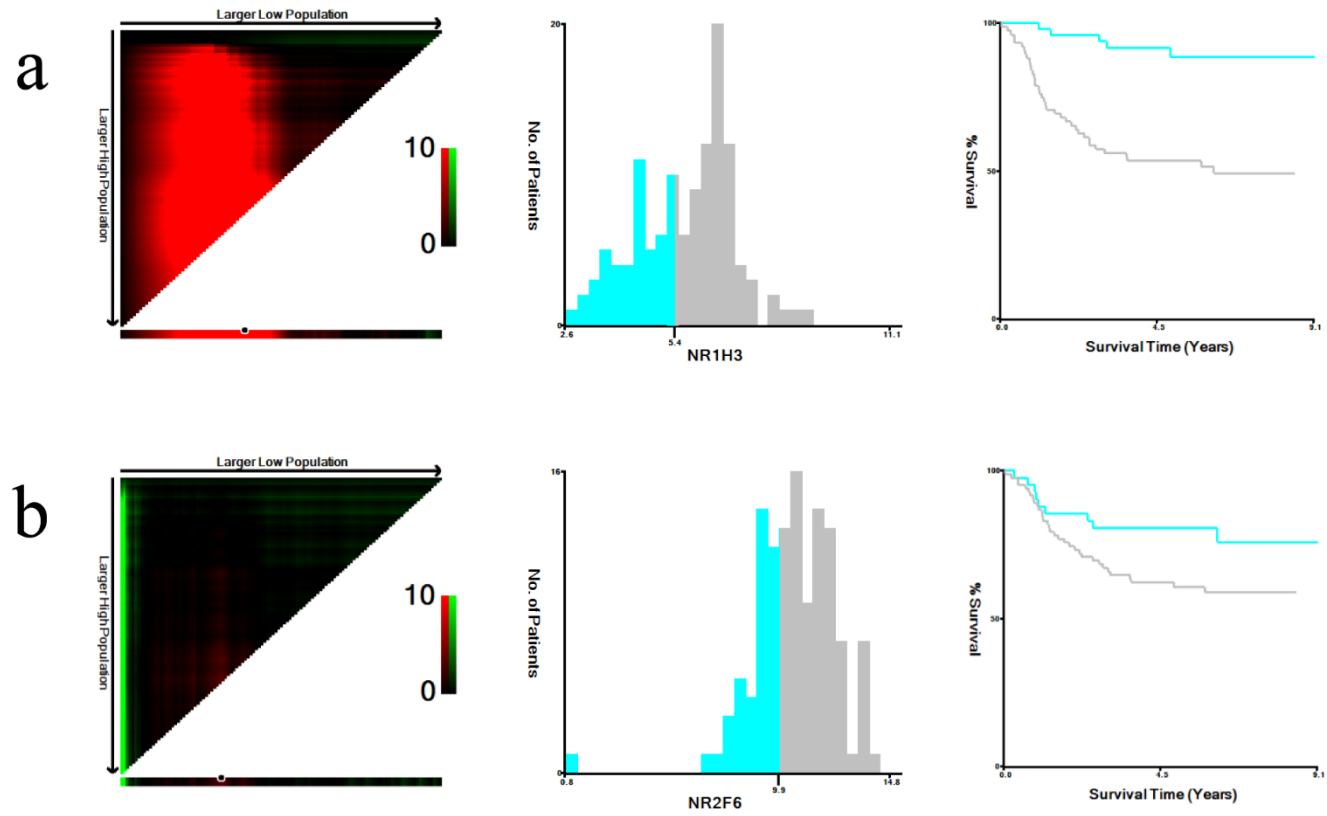

Supplementary Figure 3

### Response to chemotherapy in patients with low NR1H3

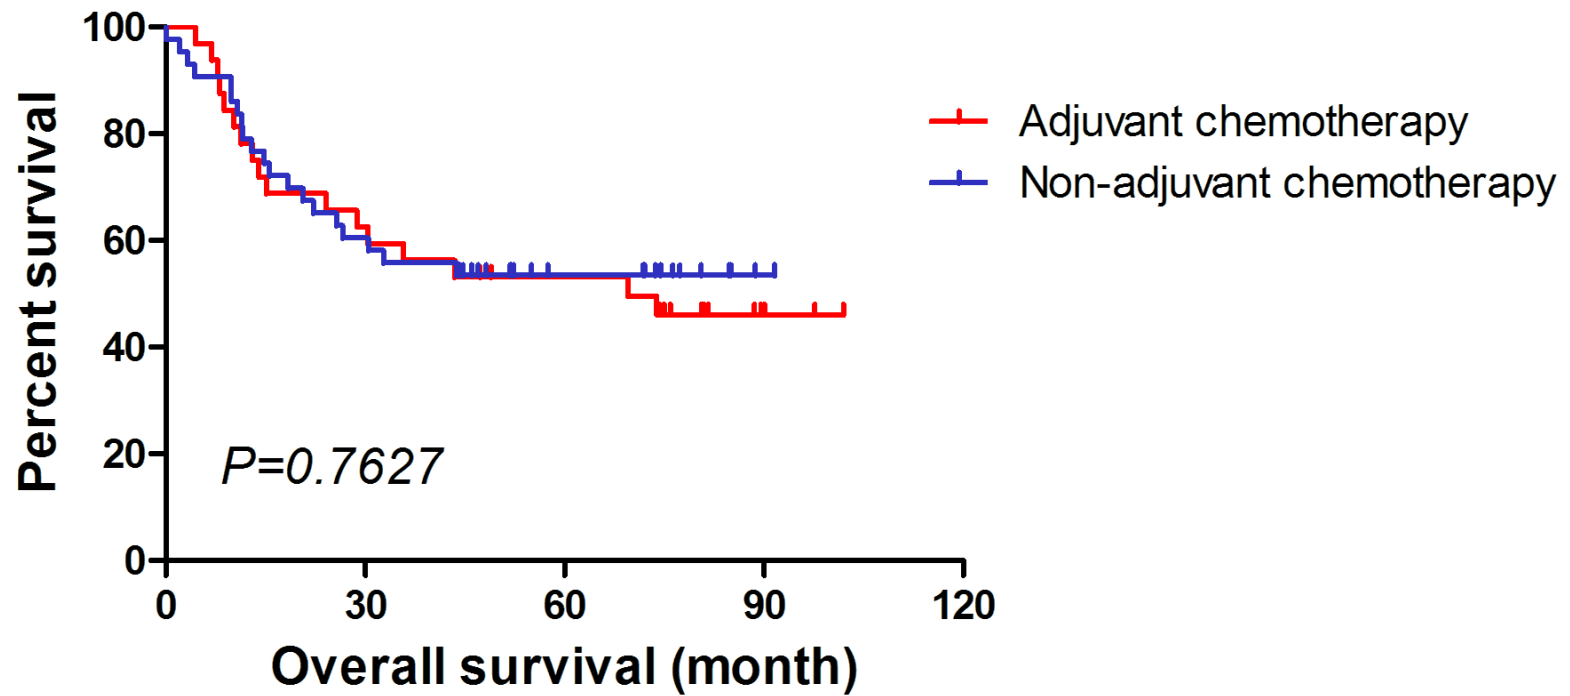

Supplement: jcav08p0852s1.pdf [file jcav08p0852s1.pdf]
